# Supplementary material
Source: PubMed Central journal article supplement (PMC5491274)
Supplement: ASN.2016040404SupplementaryData.pdf [file ASN.2016040404SupplementaryData.pdf]

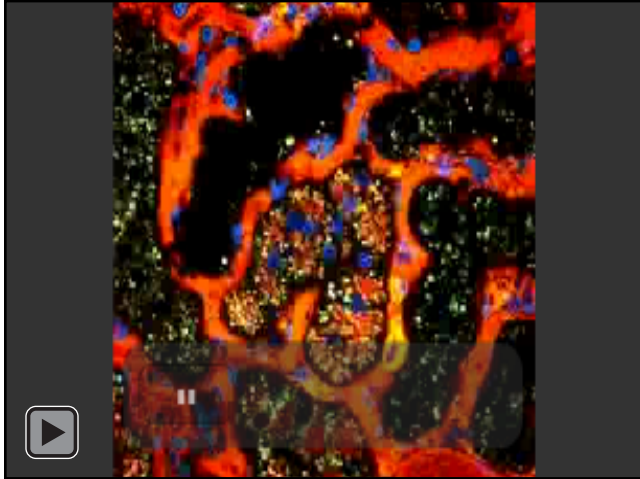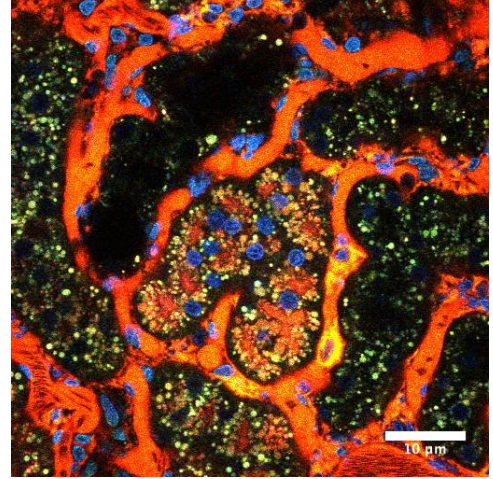

*Figure 1:post HIFD Hoechst labeling and capillary blood flow-click over the image*

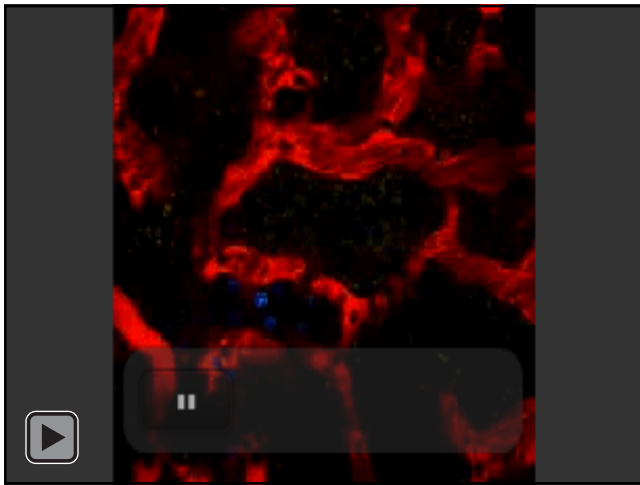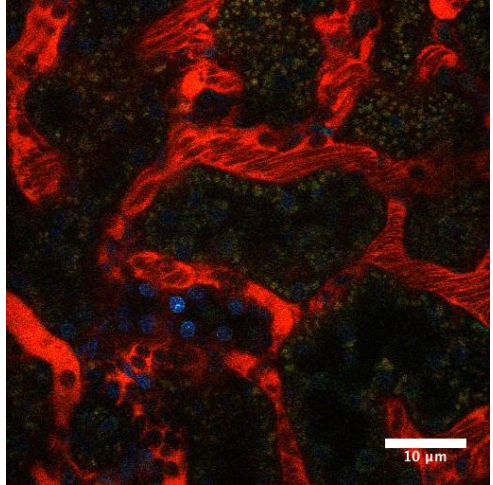

*Figure 2pre HIFD-post AKI capillary blood flow*



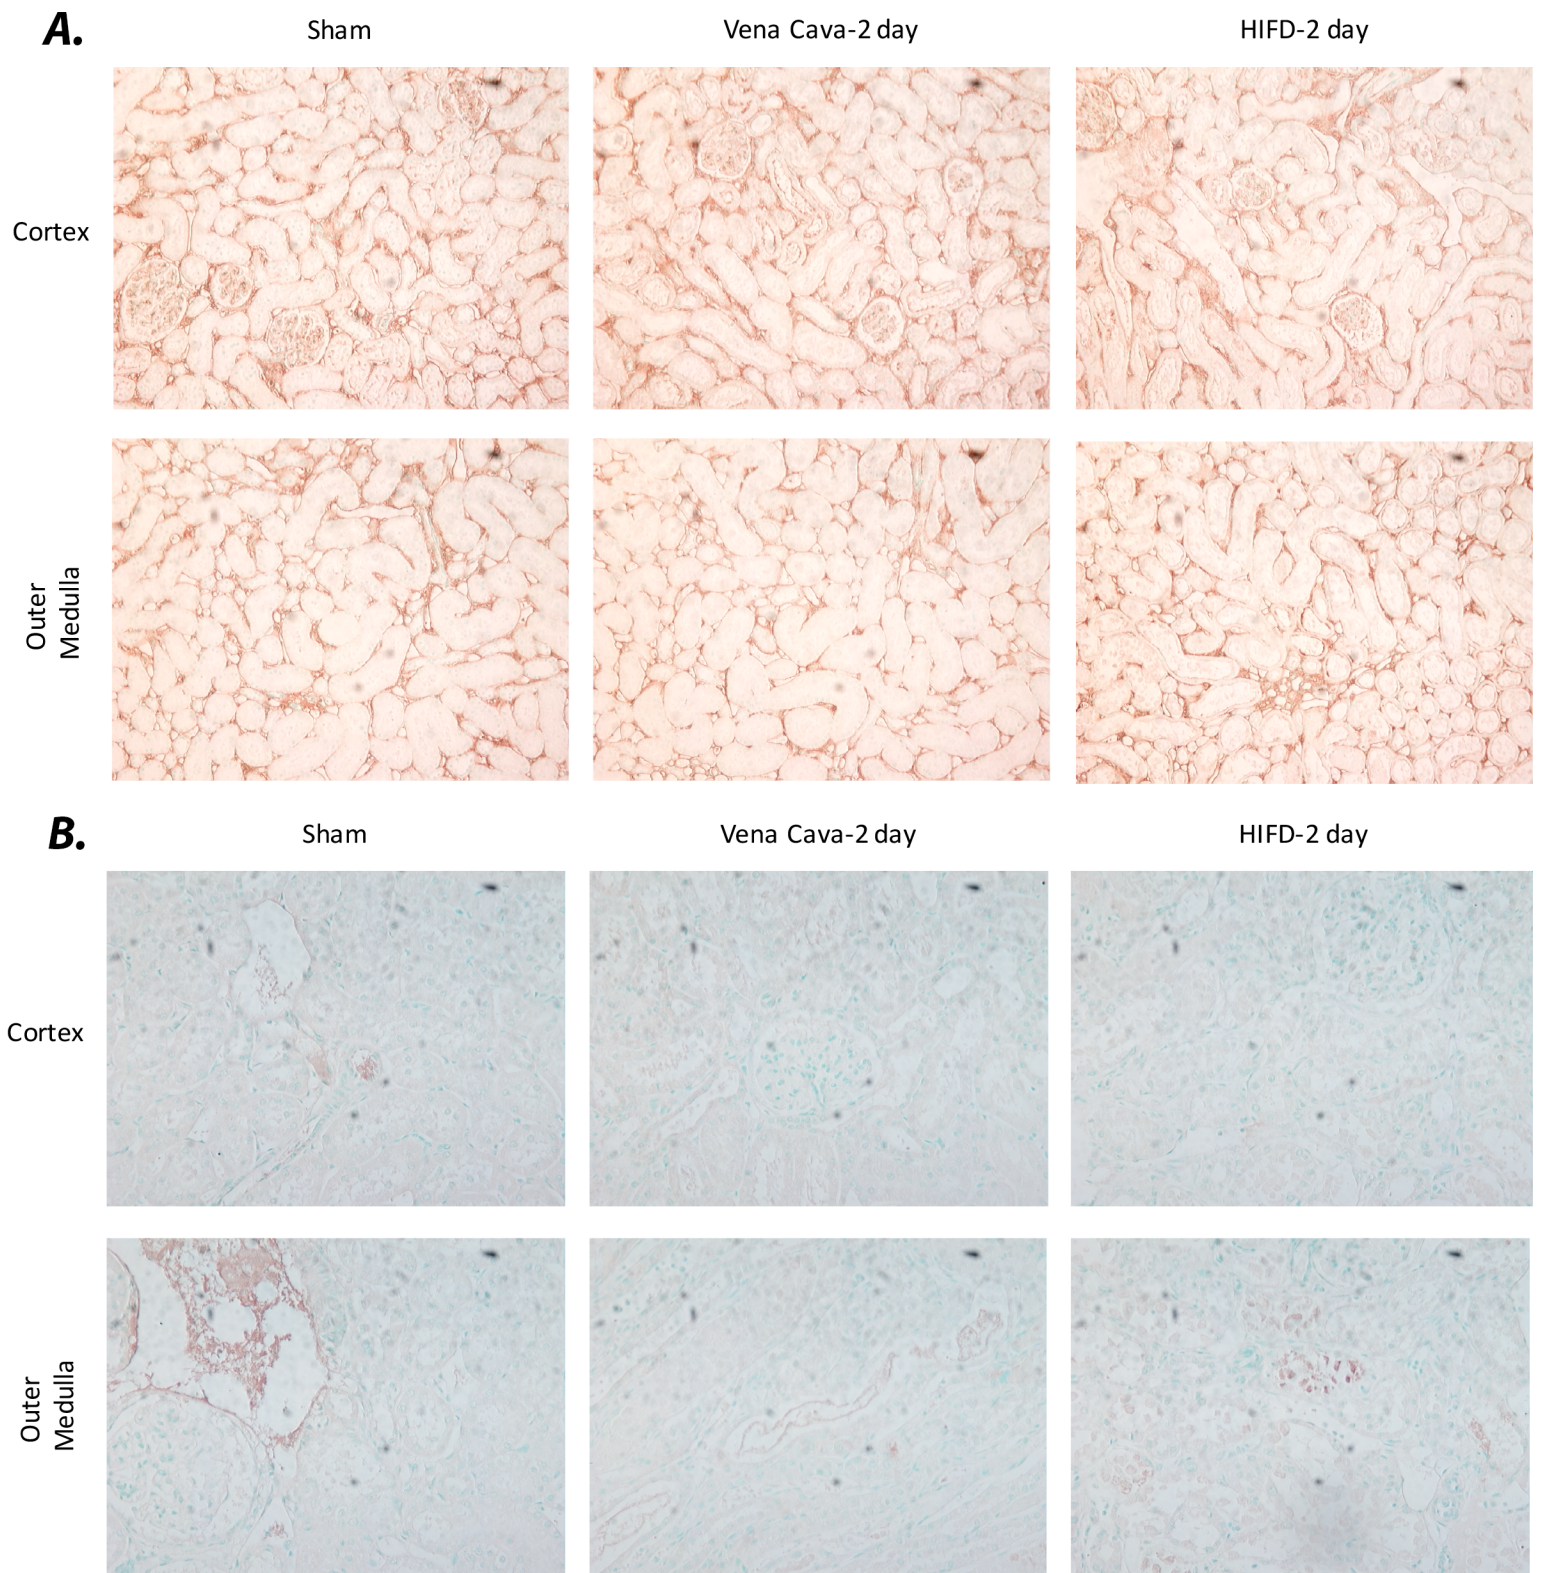

Figure S3: Representative renal histology 2-days post-I/R. Cross sections of ICAM-1 (A) and P-selectin (B) stained cortex and outer medulla from sham, I/R + vena cava injection or I/R + HIFD are shown. There was no difference between groups in either histological stains.
